# Supplementary material for: A selective colorimetric chemosensor with an electron-withdrawing group for multi-analytes CN− and F−
Source: Royal Society of Chemistry journal article supplement (doi:10.1039/c5nj00169b), 2015-01-01
Supplement: c5nj00169b1.pdf [file c5nj00169b1.pdf]

## Supporting Information

### **A selective colorimetric chemosensor with an electron-withdrawing group for multi-analytes CN<sup>-</sup> and F<sup>-</sup>**

Hee Joo Lee,<sup>a</sup> Sung Jun Park,<sup>a</sup> Hyen Je Sin,<sup>a</sup> Yu Jeong Na,<sup>b\*</sup> Cheal Kim<sup>a,b\*</sup>

<sup>a</sup> Nowon Institute of Education for the Gifted at Seoultech, Seoul National University of Science and Technology, Seoul 139-743, Korea.

<sup>b</sup> Department of Fine Chemistry, Seoul National University of Science and Technology, Seoul 139-743, Korea.  
Fax: +82-2-973-9149; Tel: +82-2-970-6693; E-mail: meureen@hanmail.net and chealkim@seoultech.ac.kr

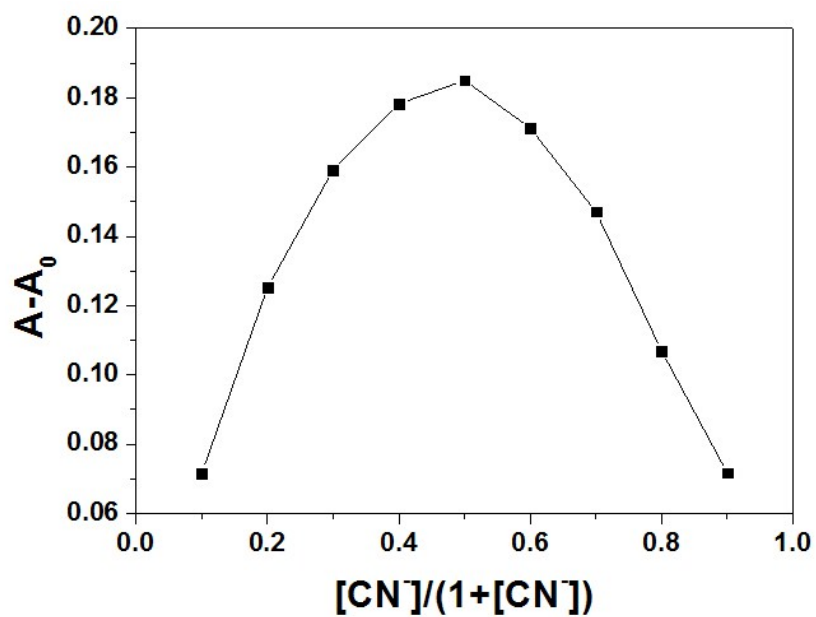

**Fig. S1** Job plot of receptor **1** and  $CN^-$  in a mixture of DMSO/bis-tris buffer (1:5, v/v). Absorbance at 469 nm was plotted as a function of the molar ratio  $[CN^-]/([1] + [CN^-])$ . The total concentrations of cyanide with receptor **1** were  $3.0 \times 10^{-5}$  M.

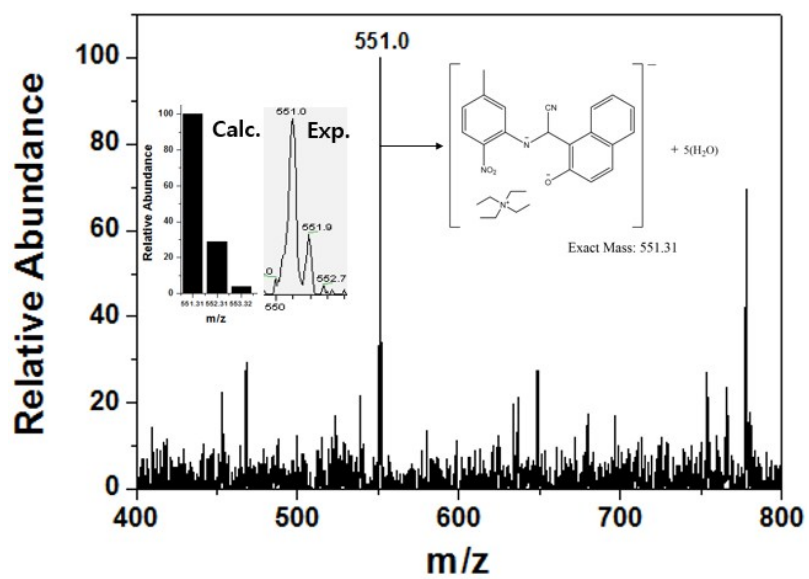

**Fig. S2** Negative-ion electrospray ionization mass spectrum of **1** (0.1 mM) upon addition of  $CN^-$  (1 equiv).

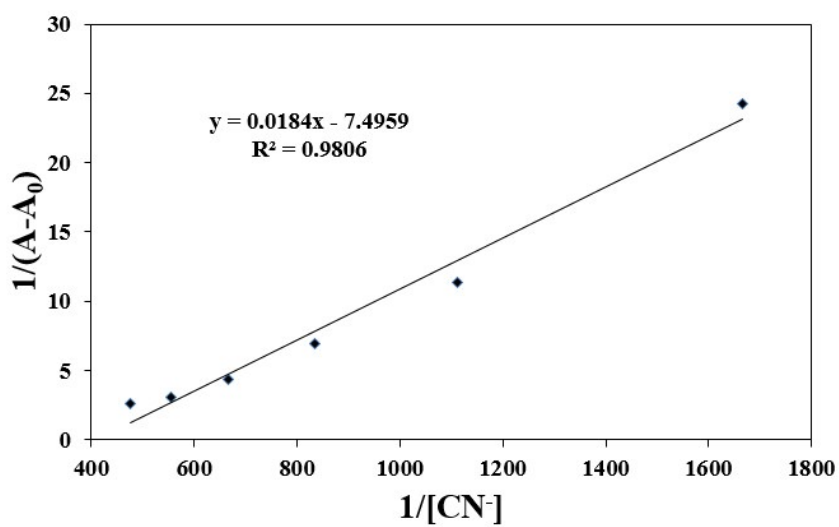

**Fig. S3** Benesi-Hildebrand plot (at 469 nm) of **1**, assuming a 1:1 stoichiometry for association between **1** and  $CN^-$ .

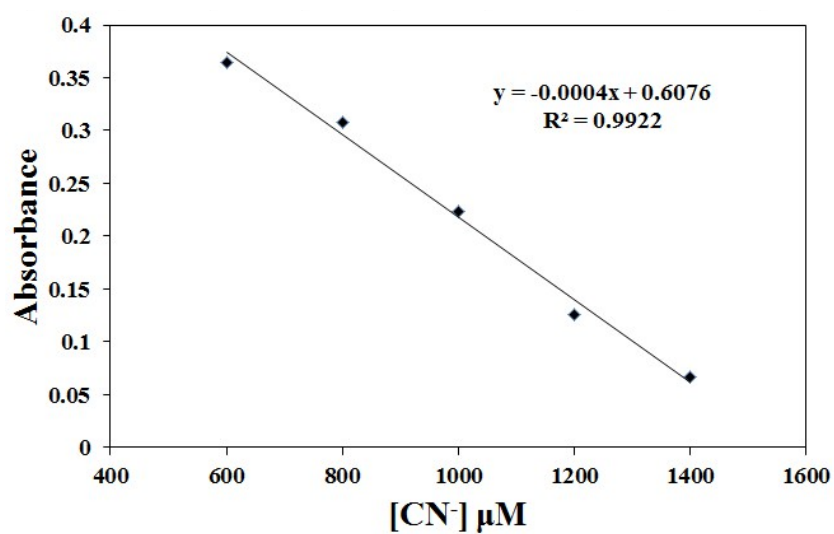

**Fig. S4** Determination of the detection limit based on absorbance change (469 nm) of **1** (30  $\mu M$ ) with  $CN^-$ .

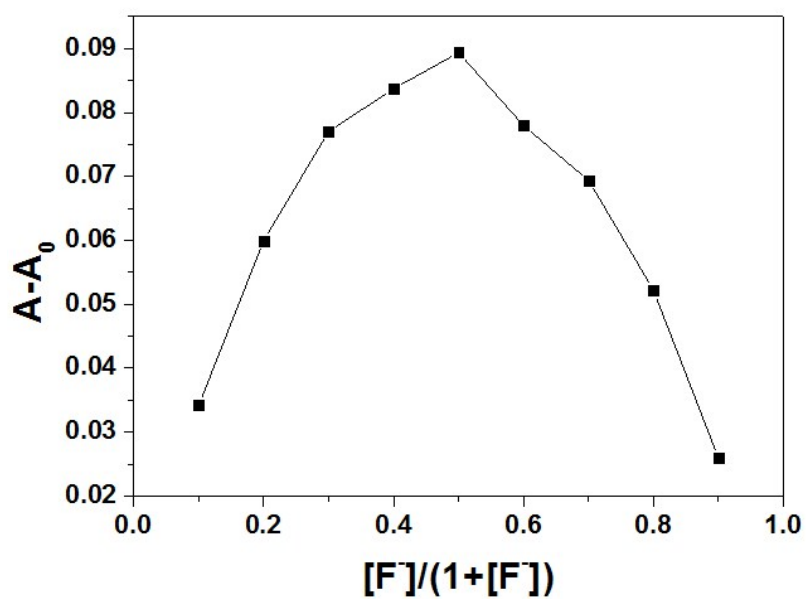

**Fig. S5** Job plot of receptor **1** and  $F^-$  in  $CH_3CN$ . Absorbance at 458 nm was plotted as a function of the molar ratio  $[F^-]/([1] + [F^-])$ . The total concentrations of fluoride with receptor **1** were  $2.0 \times 10^{-5}$  M.

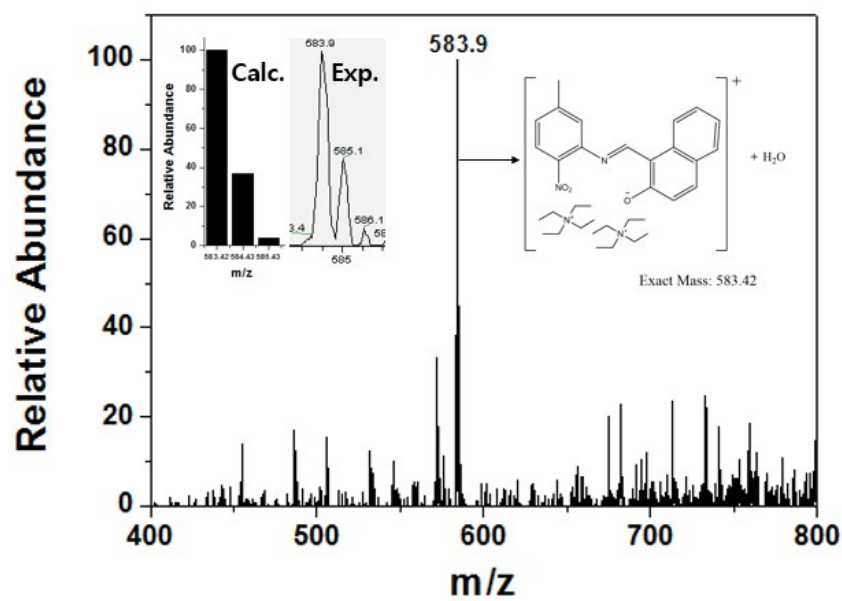

**Fig. S6** Positive-ion electrospray ionization mass spectrum of **1** (0.1 mM) upon addition of F<sup>-</sup> (1 equiv).

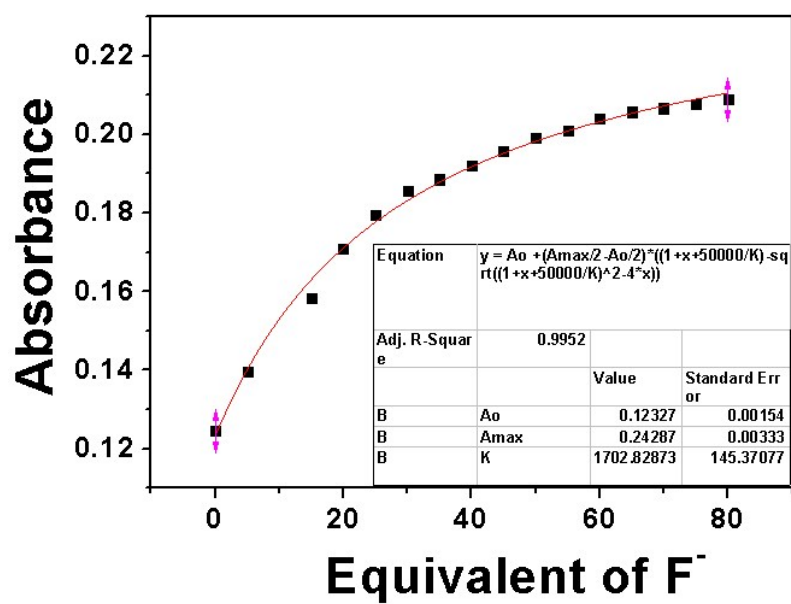

**Fig. S7** Determination of the apparent association constant based on change in the ratio (absorbance at 458 nm) of **1** (20  $\mu$ M) with  $F^-$ . The red line is the nonlinear fitting curve obtained with assuming a 1:1 association between **1** and  $F^-$ .



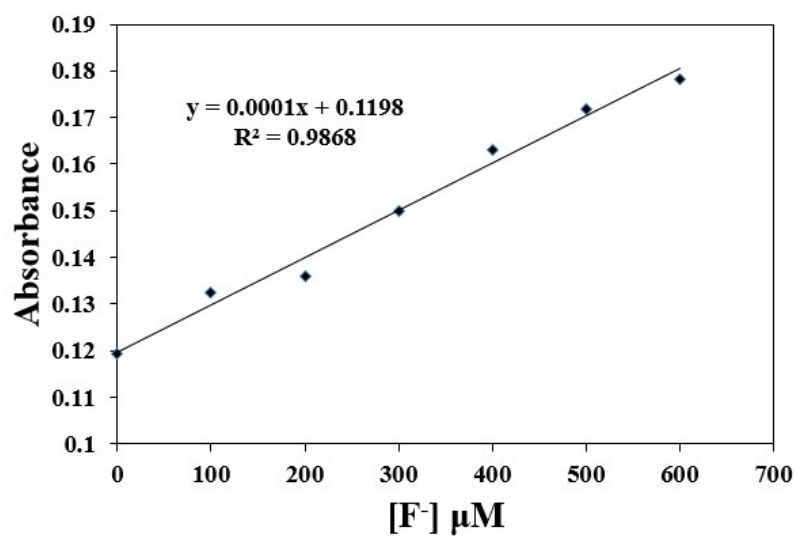

**Fig. S8** Determination of the detection limit based on absorbance change (458 nm) of **1** (20  $\mu M$ ) with  $F^-$ .
